# Supplementary material for: Metal Oxide Based Heterojunctions for Gas Sensors: A Review
Source: MDPI journal article supplement (doi:10.3390/nano11041026), 2021-04-17
Supplement: s1 [file s1]

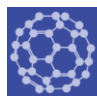

Review

# Metal Oxide Based Heterojunctions for Gas Sensors: A Review

Shulin Yang <sup>1,2</sup>, Gui Lei <sup>1,2</sup>, Huoxi Xu <sup>1,\*</sup>, Zhigao Lan <sup>1</sup>, Zhao Wang <sup>2</sup> and Haoshuang Gu <sup>1,2,\*</sup>

<sup>1</sup> Hubei Key Laboratory for Processing and Application of Catalytic Materials, School of Physics and Electronic Information, , Huanggang Normal University, Huanggang 438000, China; yangsl@hgnu.edu.cn (S.Y.); leig@hgnu.edu.cn (G.L.); lanzhg@hgnu.edu.cn (Z.L.)

<sup>2</sup> Hubei Key Laboratory of Ferro & Piezoelectric Materials and Devices, Faculty of Physics and Electronic Sciences, Hubei University, Wuhan 430062, China, wangzhao@hubu.edu.cn

\* Correspondence: author: xuhuoxi@hgnu.edu.cn (H.X.); guhsh@hubu.edu.cn (H.G.)

**Table S1.** The assembled strategies of n-n heterojunctions and their gas sensing performances.

| Sensing composites                                                                 | Type of junctions | Synthesis method                                             | Working temperature (°C) | Sensing gas/conc. (ppm) | Sensor response ( $R_a/R_g$ ) or ( $R_g/R_a$ ) <sup>a</sup> | Response time (s) | Recovery time (s) | References |
|------------------------------------------------------------------------------------|-------------------|--------------------------------------------------------------|--------------------------|-------------------------|-------------------------------------------------------------|-------------------|-------------------|------------|
| $\alpha$ -Fe <sub>2</sub> O <sub>3</sub> nanoparticles decorated ZnO nanoparticles | n-n               | Sol-gel and spin-coating method                              | Room temperature         | NH <sub>3</sub> /0.4    | 10000                                                       | 20                | 20                | [1]        |
| SnO <sub>2</sub> nanoparticles modified ZnO nanorods                               | n-n               | Wet chemical method                                          | 20                       | NO <sub>2</sub> /200    | 2.5                                                         | 720               | 840               | [2]        |
| SnO <sub>2</sub> -ZnO composite Nanofibers                                         | n-n               | Electrospinning                                              | 300                      | H <sub>2</sub> /10      | 168.6                                                       | 172               | 530               | [3]        |
| CeO <sub>2</sub> decorated ZnO nanosheets                                          | n-n               | Hydrothermal method combination with wet impregnation method | 310                      | Ethanol/100             | 90                                                          | 20                | 4                 | [4]        |
| Sb-doped SnO <sub>2</sub> covered ZnO nano-heterojunction                          | n-n               | Microwave hydrothermal method                                | NA                       | NO <sub>2</sub> /1      | 1.95                                                        | 16                | NA <sup>b</sup>   | [5]        |
| SnO <sub>2</sub> -coated ZnO nanowire                                              | n-n               | Solvothermal treatment followed with calcination             | 240                      | N-butylamine/200        | 9.2                                                         | < 30              | < 55              | [6]        |
| TiO <sub>2</sub> nanoparticles decorated ZnO nanorods                              | n-n               | Sol-gel technology followed by a spin coating method         | 120                      | NO <sub>2</sub> /50     | 112                                                         | 14                | 6                 | [7]        |
| ZnO tetrapod alloyed with Fe <sub>2</sub> O <sub>3</sub> nanoparticles             | n-n               | Flame transport synthesis                                    | 300                      | Ethanol/200             | 57.56                                                       | 65                | 220               | [8]        |
| SnO <sub>2</sub> -TiO <sub>2</sub> composite oxide                                 | n-n               | Sol-gel method                                               | 280                      | Ethanol/200             | 62                                                          | ~ 10              | ~ 8               | [9]        |
| CeO <sub>2</sub> -SnO <sub>2</sub> mixed oxide heterostructure                     | n-n               | Hydrothermal method                                          | 300                      | H <sub>2</sub> /40      | 19.23                                                       | 17                | 24                | [10]       |
| SnO <sub>2</sub> nanoparticles decorated SnS <sub>2</sub>                          | n-n               | In-situ high-temperature oxidation                           | 80                       | NO <sub>2</sub> /8      | 5.3                                                         | 159               | 297               | [11]       |
| Ultrathin mesoporous ZnO-SnO <sub>2</sub> nanosheets                               | n-n               | Urea decomposition method and subsequently calcination       | 240                      | Ethanol/50              | 80                                                          | 7                 | 42                | [12]       |
| TiO <sub>2</sub> nanoparticles decorated SnO <sub>2</sub> nanosheets               | n-n               | Hydrothermal process and PLD process                         | 260                      | Triethylamine/100       | 52.3                                                        | 16                | 22                | [13]       |
| Mg-doped TiO <sub>2</sub> /SnO <sub>2</sub> nanosheets                             | n-n               | Hydrothermal method combined with and PLD                    | 260                      | Triethylamine/50        | 30.4                                                        | 9                 | 95                | [14]       |
| SnO <sub>2</sub> -ZnO composites                                                   | n-n               | Chemical route                                               | 90                       | H <sub>2</sub> /10000   | ~ 16                                                        | 60                | 75                | [15]       |
| SnO <sub>2</sub> nanoparticles decorated MoS <sub>2</sub> nanoflowers              | n-n               | Hydrothermal method combined with PLD                        | 300                      | Triethylamine/100       | 68.7                                                        | 12                | 84                | [16]       |
| Fe <sub>2</sub> O <sub>3</sub> nanoparticles decorated SnO <sub>2</sub> nanowires  | n-n               | VSL combine with hydrothermal process                        | 300                      | Ethanol/200             | 57.56                                                       | ~ 65              | ~ 200             | [17]       |
| Mixed SnO <sub>2</sub> /TiO <sub>2</sub> included with carbon nanotubes            | n-n               | Sol-gel spin-coating method                                  | 250                      | Ethanol/1000            | 41                                                          | NA                | NA                | [18]       |
| $\alpha$ -MoO <sub>3</sub> /TiO <sub>2</sub> core/shell nanorods                   | n-n               | Hydrothermal method                                          | 180                      | Ethanol/10              | 4.8                                                         | < 40              | < 40              | [19]       |
| Nano-coaxial Co <sub>3</sub> O <sub>4</sub> /TiO <sub>2</sub> heterojunction       | n-n               | Anodic oxidation combined with hydrothermal method           | 260                      | Ethanol/100             | 40                                                          | 1.4               | 7.2               | [20]       |
| Brush-like ZnO-TiO <sub>2</sub> heterojunctions nanofibers                         | n-n               | Electrospinning and hydrothermal process.                    | 320                      | Ethanol/500             | 50                                                          | 5                 | 10                | [21]       |

|                                                                                                     |     |                                                         |     |                      |        |       |        |      |
|-----------------------------------------------------------------------------------------------------|-----|---------------------------------------------------------|-----|----------------------|--------|-------|--------|------|
| TiO <sub>2</sub> /V <sub>2</sub> O <sub>5</sub> branched nanoheterostructures                       | n-n | Electrospinning process combined with annealing         | 350 | Ethanol/100          | 24.6   | 6     | 7      | [22] |
| MoS <sub>2</sub> decorated TiO <sub>2</sub> nanotube                                                | n-n | Anodization combined hydrothermal process               | 150 | Ethanol/100          | 14.2   | ~ 15  | ~ 15   | [23] |
| SnO <sub>2</sub> decorated TiO <sub>2</sub> nanotubes                                               | n-n | Anodization combined with impregnation method.          | 250 | H <sub>2</sub> /1000 | 1140   | 2     | ~ 400  | [24] |
| TiO <sub>2</sub> nanotube arrays by ZnO modification                                                | n-n | Anodization combined with impregnation method.          | 300 | H <sub>2</sub> /100  | 340    | 22    | 2000   | [25] |
| SnO <sub>2</sub> nanoparticles decorated TiO <sub>2</sub> nanofibers                                | n-n | Electrospinning technique                               | 240 | Ethanol/100          | 9.58   | 8     | 10     | [26] |
| WO <sub>3</sub> nanorods decorated ZnO nanoplates                                                   | n-n | Hydrothermal treatment                                  | 250 | NH <sub>3</sub> /300 | 24     | 60    | 50     | [27] |
| WO <sub>3</sub> nanoclusters-SnO <sub>2</sub> film                                                  | n-n | Pulsed laser deposition technique                       | 100 | NO <sub>2</sub> /10  | 51000  | 67    | 17.05  | [28] |
| SnO <sub>2</sub> nanoparticles modified WO <sub>3</sub> nanolamella                                 | n-n | Acidification method combined with calcination          | 200 | NO <sub>2</sub> /0.2 | 370    | NA    | NA     | [29] |
| MoO <sub>3</sub> -ZnO core-shell nanorods                                                           | n-n | Hydrothermal method combined with ALD                   | 350 | Ethanol/200          | 7.62   | 44.88 | 119.87 | [30] |
| MoS <sub>2</sub> -MoO <sub>3</sub> hybrid microflowers                                              | n-n | Controlled vapor transport process                      | 25  | NO <sub>2</sub> /10  | 1.35   | 19    | 182    | [31] |
| ZnO nanoparticles decorated                                                                         | n-n | Hydrothermal method                                     | 250 | Ethanol/100          | 18     | 2.5   | 5      | [32] |
| MoO <sub>3</sub> /ZnO composite                                                                     | n-n | Hydrothermal method                                     | 270 | H <sub>2</sub> S/100 | 30     | 13    | 29     | [33] |
| MoO <sub>3</sub> /Fe <sub>2</sub> O <sub>3</sub> composite                                          | n-n | Hydrothermal strategy                                   | 206 | Xylene/100           | 6.9    | 87    | 190    | [34] |
| MoO <sub>3</sub> /V <sub>2</sub> O <sub>5</sub> composite                                           | n-n | Spray pyrolysis deposition                              | 200 | NO <sub>2</sub> /100 | 1.8    | 118   | 1182   | [35] |
| MoO <sub>3</sub> /SnO <sub>2</sub> composite                                                        | n-n | Wet-chemical method combined with calcination           | 115 | H <sub>2</sub> S/10  | 43.5   | 22    | 10     | [36] |
| Fe <sub>2</sub> O <sub>3</sub> /WO <sub>3</sub> nanocomposites                                      | n-n | Two-step solution-based method                          | 260 | Acetone/100          | 105.8  | 7     | 20     | [37] |
| In <sub>2</sub> O <sub>3</sub> / $\alpha$ -Fe <sub>2</sub> O <sub>3</sub> heterostructure nanotubes | n-n | Single-capillary electrospinning method                 | 225 | Ethanol/100          | 24.41  | 3-5   | 6-10   | [38] |
| TiO <sub>2</sub> nanoparticles decorated $\alpha$ -Fe <sub>2</sub> O <sub>3</sub> nanorods          | n-n | Thermal oxidation combined with solvothermal treatment  | 300 | H <sub>2</sub> S/200 | 7.4    | ~ 150 | ~ 155  | [39] |
| Fe <sub>2</sub> O <sub>3</sub> /ZnO core/shell nanorod                                              | n-n | Solution phase controlled hydrolysis method             | 200 | Ethanol/50           | 6.48   | < 20  | < 20   | [40] |
| ZnO/Fe <sub>2</sub> O <sub>3</sub> heterostructure                                                  | n-n | Hydrothermal method combined with ALD                   | 250 | H <sub>2</sub> S/50  | ~ 100  | 19.1  | 156.5  | [41] |
| ZnO nanoparticles decorated $\alpha$ -Fe <sub>2</sub> O <sub>3</sub>                                | n-n | Hydrothermal method                                     | 200 | Acetone/200          | ~ 43   | 19    | 20     | [42] |
| TiO <sub>2</sub> -In <sub>2</sub> O <sub>3</sub> composite nanofibers                               | n-n | Electrospinning method                                  | 25  | NO <sub>2</sub> /0.3 | NA     | 0.1   | 10.3   | [43] |
| Mixed Fe <sub>2</sub> O <sub>3</sub> -In <sub>2</sub> O <sub>3</sub> nanotubes                      | n-n | Electrospinning                                         | 250 | Formaldehyde/100     | 33     | 5     | 25     | [44] |
| Fe <sub>2</sub> O <sub>3</sub> nanoparticles modified In <sub>2</sub> O <sub>3</sub> nanowires      | n-n | Thermal evaporation followed by solvothermal deposition | 200 | Acetone/500          | ~ 10   | ~ 55  | ~80    | [45] |
| SnO <sub>2</sub> -In <sub>2</sub> O <sub>3</sub> composite                                          | n-n | Solid-phase reaction method                             | 160 | Methanol/100         | 320.73 | 32    | 47     | [46] |
| ZnO-modified In <sub>2</sub> O <sub>3</sub> heterojunction                                          | n-n | Hydrothermal method combined                            | 300 | HCHO/100             | 46.8   | 6     | 7      | [47] |

| with ultrasonic re-action                                                        |     |                                                          |                  |                      |       |     |     |      |
|----------------------------------------------------------------------------------|-----|----------------------------------------------------------|------------------|----------------------|-------|-----|-----|------|
| In <sub>2</sub> O <sub>3</sub> -core/ZnO-shell nanorod                           | n-n | Thermal evaporation followed by ALD                      | 300              | H <sub>2</sub> S/100 | 1.28  | 530 | 500 | [48] |
| Core-Shell In <sub>2</sub> O <sub>3</sub> /ZnO nanoarray                         | n-n | Hydrothermal process combined with a wet-chemical method | Room temperature | H <sub>2</sub> S/700 | 925   | NA  | NA  | [49] |
| SnO <sub>2</sub> hollow spheres decorated with CeO <sub>2</sub> nanoparticles    | n-n | Two-step hydrothermal strategy                           | 225              | Ethanol/100          | 37    | 2   | 70  | [50] |
| Branch-like $\alpha$ -Fe <sub>2</sub> O <sub>3</sub> /TiO <sub>2</sub> nanofiber | n-n | Electrospinning technique and hydrothermal process       | 95               | TMA/50               | 15    | 75  | 112 | [51] |
| ZnO-SnO <sub>2</sub> composite                                                   | n-n | Hydrothermal method                                      | 26               | O <sub>3</sub> /0.6  | 12    | 13  | 90  | [52] |
| In <sub>2</sub> O <sub>3</sub> nanoparticles on ZnO hollow nanotubes             | n-n | Hydrothermal method                                      | 260              | Ethanol/100          | 68.19 | 8   | 10  | [53] |

<sup>a</sup>In this table, the R<sub>a</sub> and the R<sub>g</sub> were the resistances of the sensor in the air and the resistances of the sensor in the targeted gases, respectively. <sup>b</sup>The NA in the table means that the related information was not given in the references.

**Table S2.** The assembled strategies of n-p heterojunctions and their gas sensing performances.

| Sensing composites                                                             | Type of junctions | Synthesis method                                          | Working temperature (°C) | Sensing gas/conc. (ppm) | Sensor response ( $R_a/R_g$ ) or ( $R_g/R_a$ ) <sup>a</sup> | Response time (s) | Recovery time (s) | References |
|--------------------------------------------------------------------------------|-------------------|-----------------------------------------------------------|--------------------------|-------------------------|-------------------------------------------------------------|-------------------|-------------------|------------|
| NiO nanoparticles modified ZnO nanorods                                        | n-p               | Two-step chemical bath deposition                         | 330                      | Acetone/100             | ~ 13                                                        | ~ 5               | ~ 10              | [54]       |
| NiO/ZnO nanofibers                                                             | n-p               | Electrospinning                                           | 260                      | TMA/100                 | 892                                                         | 18                | 20                | [55]       |
| CuO nanoparticles decorated ZnO nanorods                                       | n-p               | Solution-based synthesis method                           | 25                       | NO/10                   | 3.65                                                        | 100               | > 600             | [56]       |
| CdO nanoparticles-decorated flower-like ZnO hollow microspheres                | n-p               | Two-step hydrothermal strategy                            | 250                      | Ethanol/100             | 65.5                                                        | 2                 | 136               | [57]       |
| ZnO nanowire arrays/CuO nanospheres heterostructure                            | n-p               | Hydrothermal method                                       | 122                      | Ethanol/80              | NA <sup>b</sup>                                             | 41                | 99                | [58]       |
| ZnO/CuO composite                                                              | n-p               | Solvothermal method                                       | 40                       | H <sub>2</sub> S/10     | 23.03                                                       | 173               | > 3000            | [59]       |
| PdO-decorated flower-like ZnO structures                                       | n-p               | Hydrothermal route combined with heat treatment           | 320                      | Ethanol/100             | 35.4                                                        | 1                 | 7                 | [60]       |
| Cr <sub>2</sub> O <sub>3</sub> -functionalization ZnO nanorods                 | n-p               | Carbothermal synthesis combined with solvothermal process | 25                       | Ethanol/200             | 10.95                                                       | 26                | 110               | [61]       |
| CuO nanoparticles decorated SnO <sub>2</sub> nanowires                         | n-p               | Two-step CVD                                              | 200                      | H <sub>2</sub> S/1      | 700                                                         | NA                | NA                | [62]       |
| Co <sub>3</sub> O <sub>4</sub> decorated flower-like SnO <sub>2</sub> nanorods | n-p               | Hydrothermal method followed by chemical solution method  | 280                      | Xylene/100              | 47.8                                                        | 98                | 107               | [63]       |
| NiO-SnO <sub>2</sub> composite nanofibers                                      | n-p               | Electrospinning                                           | 320                      | H <sub>2</sub> /100     | ~ 14                                                        | ~ 3               | ~ 3               | [64]       |
| NiO/SnO <sub>2</sub> hollow sphere                                             | n-p               | Hydrothermal method followed by PLD process               | 220                      | Triethylamine/10        | 48.6                                                        | 11                | 34                | [65]       |
| CuO nanoparticles decorate SnO <sub>2</sub> nanorods                           | n-p               | Hydrothermal method                                       | 60                       | H <sub>2</sub> S/10     | 94000                                                       | ~ 60              | NA                | [66]       |
| NiO-SnO <sub>2</sub> microflowers                                              | n-p               | Hydrothermal route                                        | 200                      | Formaldehyde/100        | ~ 27.5                                                      | 20                | 64                | [67]       |
| Bi <sub>2</sub> O <sub>3</sub> -branched SnO <sub>2</sub> nanowires            | n-p               | Vapor-liquid-solid method                                 | 250                      | NO <sub>2</sub> /2      | 56.92                                                       | ~ 195             | ~ 20              | [68]       |
| Co <sub>3</sub> O <sub>4</sub> /SnO <sub>2</sub> flower-like structures        | n-p               | One-step hydrothermal technique                           | 175                      | Trimethylamine/5        | 9.3                                                         | 19                | 29                | [69]       |
| CeO <sub>2</sub> /TiO <sub>2</sub> core/shell nanorods                         | n-p               | Hydrothermal method                                       | 320                      | Ethanol/1000            | 5.44                                                        | < 45              | < 45              | [70]       |
| Co <sub>3</sub> O <sub>4</sub> /TiO <sub>2</sub> nanotube heterostructures     | n-p               | Anodization combined and cathodic deposition              | 200                      | H <sub>2</sub> /1000    | 1.06                                                        | ~ 720             | ~ 600             | [71]       |
| CuO nanoparticles decorated WO <sub>3</sub> nanoplates                         | n-p               | Hydrothermal method                                       | 100                      | H <sub>2</sub> S/5      | 223                                                         | 73                | 450               | [72]       |
| NiO-decorated WO <sub>3</sub> nanocomposite                                    | n-p               | Hydrothermal process combined with solvothermal method    | 350                      | Ethanol/150             | ~ 80                                                        | ~ 10              | ~ 5               | [73]       |
| CuO-modified WO <sub>3</sub> thin film                                         | n-p               | RF sputtering technique                                   | 300                      | H <sub>2</sub> S/10     | 534                                                         | 2                 | ~ 1440            | [74]       |
| CuO-functionalized WO <sub>3</sub> nanowires                                   | n-p               | Thermal evaporation combined with thermal annealing       | 300                      | H <sub>2</sub> S/100    | 6.73                                                        | ~ 60              | ~ 70              | [75]       |
| Cr <sub>2</sub> O <sub>3</sub> nanoparticle modified WO <sub>3</sub> nanorods  | n-p               | Thermal evaporation followed by spin-coating              | 300                      | Ethanol/200             | 5.58                                                        | ~ 50              | ~ 60              | [76]       |
| WO <sub>3</sub> /CuO composites                                                | n-p               | Hydrothermal method                                       | 80                       | H <sub>2</sub> S/5      | 105.14                                                      | 42                | 3500              | [77]       |
| CuO nanoparticles decorated $\alpha$ -MoO <sub>3</sub> nanorods                | n-p               | Hydrothermal method combined with heating                 | 180                      | H <sub>2</sub> S/50     | 160.8                                                       | ~ 20              | 40                | [78]       |
| PdO nanoparticles decorated WO <sub>3</sub> nanoneedle                         | n-p               | Aerosol assisted CVD                                      | 200                      | H <sub>2</sub> /500     | 1500                                                        | 120               | 720               | [79]       |
| Fe <sub>2</sub> O <sub>3</sub> /Co <sub>3</sub> O <sub>4</sub> composite       | n-p               | Hydrothermal route                                        | 300                      | Ethanol/100             | 10.86                                                       | 1.36              | 40.25             | [80]       |
| p-NiS/n-In <sub>2</sub> O <sub>3</sub> heterojunction nanocomposites           | n-p               | Solid-state grinding and calcination                      | 300                      | Ethanol/100             | 10.8                                                        | 8                 | 20                | [81]       |

|                                                                                                |     |                                                        |                  |                                  |       |        |        |      |
|------------------------------------------------------------------------------------------------|-----|--------------------------------------------------------|------------------|----------------------------------|-------|--------|--------|------|
| Bi <sub>2</sub> O <sub>3</sub> nanoparticles decorated In <sub>2</sub> O <sub>3</sub> nanorods | n-p | One-step CVD process                                   | 200              | Ethanol/200                      | 17.74 | 23     | 200    | [82] |
| NiO-In <sub>2</sub> O <sub>3</sub> composite nanofibers                                        | n-p | Electrospinning and calcination method                 | 300              | Ethanol/100                      | 78    | ~ 6    | 60     | [83] |
| SnO <sub>2</sub> -Co <sub>3</sub> O <sub>4</sub> composite nanofibers                          | n-p | Electrospinning method                                 | 350              | C <sub>6</sub> H <sub>6</sub> /1 | 18.7  | 13.58  | 13.65  | [84] |
| ZnO/Co <sub>3</sub> O <sub>4</sub> composite nanoparticle                                      | n-p | Solvothermal route                                     | Room temperature | NO <sub>2</sub> /5               | 15    | ~ 17.5 | ~ 32.5 | [85] |
| Porous flower-like CuO/ZnO nanostructures                                                      | n-p | Chemical solution method                               | 220              | Ethanol/100                      | 25.5  | 6      | 42     | [86] |
| CuO/ZnO heterostructured nanorods                                                              | n-p | A photochemical method                                 | 500              | H <sub>2</sub> S/50              | 891   | ~ 820  | ~ 20   | [87] |
| CuO-modified SnO <sub>2</sub> film                                                             | n-p | Screen printing technique combined with firing process | 25               | H <sub>2</sub> S/1               | 3672  | < 15   | ~ 240  | [88] |
| CuO nanoparticles modified SnO <sub>2</sub> nanowire                                           | n-p | Chemical vapour deposition                             | 200              | H <sub>2</sub> S/2               | 3261  | < 180  | < 600  | [89] |
| CuO nanoparticle decorated ZnO nanorod                                                         | n-p | Two-stage solution process                             | 100              | H <sub>2</sub> S/100             | ~ 38  | ~ 120  | ~ 120  | [90] |
| CuO nanoparticles decorated ZnO nanoparticles                                                  | n-p | Hydrothermal method                                    | 200              | Alcohol/200                      | 3.3   | 62     | 83     | [91] |
| CuO/ZnO heterojunction nanorods                                                                | n-p | Hydrothermal process combined with annealing           | 300              | Ethanol/100                      | 98.8  | 7      | 9      | [92] |

<sup>a</sup>In this table, the R<sub>a</sub> and the R<sub>g</sub> were the resistances of the sensor in the air and the resistances of the sensor in the targeted gases, respectively. <sup>b</sup>The NA in the table means that the related information was not given in the references.

**Table S3.** The assembled strategies of p-n heterojunctions and their gas sensing performances.

| Sensing composites                                                                                                | Type of junctions | Synthesis method                                        | Working temperature (°C) | Sensing gas/conc. (ppm)                | Sensor response ( $R_a/R_g$ ) or ( $R_g/R_a$ ) <sup>a</sup> | Response time (s) | Recovery time (s) | References |
|-------------------------------------------------------------------------------------------------------------------|-------------------|---------------------------------------------------------|--------------------------|----------------------------------------|-------------------------------------------------------------|-------------------|-------------------|------------|
| NiO-SnO <sub>2</sub> foam                                                                                         | p-n               | Dip-coating process                                     | 210                      | Toluene/10                             | 19.2                                                        | 9                 | 8                 | [93]       |
| NiO/ZnO heterojunction diode                                                                                      | p-n               | Spin-coating followed by hydrothermal method            | 300                      | Toluene/95                             | 20.1                                                        | 100               | 60                | [94]       |
| $\alpha$ -Fe <sub>2</sub> O <sub>3</sub> /NiO heterojunction nanorods                                             | p-n               | Hydrothermal method                                     | 280                      | Acetone/100                            | 290                                                         | 28                | 40                | [95]       |
| Hierarchical $\alpha$ -Fe <sub>2</sub> O <sub>3</sub> /NiO composites                                             | p-n               | Hydrothermal method                                     | 200                      | Toluene/100                            | 16.38                                                       | 1                 | 12                | [96]       |
| Cr <sub>2</sub> O <sub>3</sub> nanoparticles decorated In <sub>2</sub> O <sub>3</sub> nanorods                    | p-n               | Thermal evaporation followed by solvothermal deposition | 200                      | Ethanol/500                            | 10.53                                                       | ~ 17.5            | ~ 50              | [97]       |
| Fe <sub>2</sub> O <sub>3</sub> /Co <sub>3</sub> O <sub>4</sub> codecorated In <sub>2</sub> O <sub>3</sub> nanorod | p-n               | Thermal evaporation followed by solvothermal deposition | 200                      | Ethanol/200                            | 35                                                          | 10                | 120               | [98]       |
| Co <sub>3</sub> O <sub>4</sub> /ZnO nanocomposites                                                                | p-n               | Chemical vapor deposition                               | 400                      | CH <sub>3</sub> COCH <sub>3</sub> /100 | 1.2                                                         | NA <sup>b</sup>   | NA                | [99]       |
| Co <sub>3</sub> O <sub>4</sub> / $\alpha$ -Fe <sub>2</sub> O <sub>3</sub> heterostructure nanofibers              | p-n               | Coaxial electrospinning method                          | 240                      | Acetone/50                             | 11.7                                                        | 2                 | 20                | [100]      |
| Co <sub>3</sub> O <sub>4</sub> -SnO <sub>2</sub> hollow hetero-nanostructures                                     | p-n               | Galvanic replacement                                    | 275                      | Ethanol/5                              | 13.5                                                        | NA                | NA                | [101]      |
| Hierarchical Fe <sub>3</sub> O <sub>4</sub> @Co <sub>3</sub> O <sub>4</sub> core-shell microspheres               | p-n               | Hydrothermal method                                     | 160                      | Acetone/100                            | 100                                                         | 5                 | 15                | [102]      |
| Rh <sub>2</sub> O <sub>3</sub> clusters decorated WO <sub>3</sub> crystallites                                    | p-n               | Wet-chemical method                                     | 300                      | CO/0.9                                 | NA                                                          | NA                | NA                | [103]      |
| Co <sub>3</sub> O <sub>4</sub> /SnO <sub>2</sub> core-shell nanospheres                                           | p-n               | Hydrothermal method                                     | 200                      | NH <sub>3</sub> /50                    | 13.5                                                        | 4                 | 17                | [104]      |
| ZnO-Co <sub>3</sub> O <sub>4</sub> hollow polyhedrons heterostructure                                             | p-n               | Thermal decomposition                                   | 200                      | Ethanol/1000                           | 106                                                         | 7                 | 236               | [105]      |
| ZnO/Co <sub>3</sub> O <sub>4</sub> microspheres                                                                   | p-n               | Solvothermal method combined annealing process          | 275                      | Ethanol/50                             | 120                                                         | 5.6               | 29                | [106]      |
| Co <sub>3</sub> O <sub>4</sub> -TiO <sub>2</sub> composite                                                        | p-n               | Thermal conversion                                      | 115                      | Xylene/50                              | 113                                                         | 130               | 150               | [107]      |
| Ultra-thin CuO islands on sputtered SnO <sub>2</sub>                                                              | p-n               | Sputtering followed by thermal evaporation              | 150                      | H <sub>2</sub> S/20                    | 7400                                                        | 15                | 118               | [108]      |
| CuO/ZnO thin film heterojunction                                                                                  | p-n               | Sol-gel technique                                       | 300                      | H <sub>2</sub> /3000                   | 266.5                                                       | NA                | NA                | [109]      |
| CuO@ZnO microcubes                                                                                                | p-n               | Two-step solution route                                 | 240                      | Ethanol/50                             | 19.1                                                        | 5-6               | ~ 18              | [110]      |
| ZnO branched p-Cu <sub>x</sub> O@n-ZnO nanowires                                                                  | p-n               | Hydrothermal method and ALD                             | 250                      | Acetone/5                              | 3.39                                                        | 62                | 90                | [111]      |
| CuO-In <sub>2</sub> O <sub>3</sub> core-shell nanowire                                                            | p-n               | Thermal oxidation combined with heating                 | 300                      | CO/960                                 | 1.6                                                         | 25                | 65                | [112]      |
| Fe <sub>2</sub> O <sub>3</sub> decorated CuO nanorods                                                             | p-n               | Solvothermal route                                      | 240                      | Acetone/1000                           | 10.9                                                        | 64                | 80                | [113]      |

<sup>a</sup>In this table, the  $R_a$  and the  $R_g$  were the resistances of the sensor in the air and the resistances of the sensor in the targeted gases, respectively. <sup>b</sup>The NA in the table means that the related information was not given in the references.

**Table S4.** The assembled strategies of p-p heterojunctions and their gas sensing performances.

| Sensing composites                                                      | Type of junctions | Synthesis method                                   | Working temperature (°C) | Sensing gas/conc. (ppm) | Sensor response ( $R_a/R_g$ ) or ( $R_g/R_a$ ) <sup>a</sup> | Response time (s) | Recovery time (s) | References |
|-------------------------------------------------------------------------|-------------------|----------------------------------------------------|--------------------------|-------------------------|-------------------------------------------------------------|-------------------|-------------------|------------|
| TeO <sub>2</sub> -core/CuO-shell composite                              | p-p               | Thermal evaporation followed by sputter deposition | 150                      | NO <sub>2</sub> /10     | 4.25                                                        | NA                | NA                | [114]      |
| CuO-NiO core-shell microspheres                                         | p-p               | Two-step hydrothermal method                       | 260                      | H <sub>2</sub> S/100    | 47.6                                                        | 18                | 29                | [115]      |
| Cu <sub>2</sub> O/CuO sub-microspheres                                  | p-p               | Hydrothermal treatment                             | 135                      | H <sub>2</sub> S/1      | 5.5                                                         | ~ 60              | ~ 60              | [116]      |
| CuO-NiO nanotubes                                                       | p-p               | one-pot synthesis                                  | 110                      | Glycol/100              | 10.35                                                       | 15                | 45                | [117]      |
| NiFe <sub>2</sub> O <sub>4</sub> nanoparticles-decorated NiO nanosheets | p-p               | Solvothermal condition                             | 280                      | Acetone/50              | 23                                                          | -                 | -                 | [118]      |
| NiO/NiCr <sub>2</sub> O <sub>4</sub> nanoparticles                      | p-p               | Hydrothermal route                                 | 225                      | Xylene/100              | 66.2                                                        | 1217              | 591               | [119]      |
| CuO nanoparticles decorated NiO nanosheets                              | p-p               | A simple reflux and hydrothermal method            | 22                       | NO <sub>2</sub> /100    | 4.85                                                        | 2                 | NA                | [120]      |
| Cu <sub>3</sub> Mo <sub>2</sub> O <sub>9</sub> @CuO nanorods            | p-p               | CVD                                                | RT                       | NO <sub>2</sub> /5      | 1.6                                                         | 49                | 241               | [121]      |

<sup>a</sup>In this table, the  $R_a$  and the  $R_g$  were the resistances of the sensor in the air and the resistances of the sensor in the targeted gases, respectively. <sup>b</sup>The NA in the table means that the related information was not given in the references.

## References

- [1] Tang, H.; Yan M.; Zhang H.; Li S.; Ma X.; Wang M.; Yang D. A selective NH<sub>3</sub> gas sensor based on Fe<sub>2</sub>O<sub>3</sub>-ZnO nanocomposites at room temperature. *Sensors and Actuators B: Chemical* **2006**, 114, 910–915.
- [2] Lu, G.; Xu J.; Sun J.; Yu Y.; Zhang Y.; Liu F. UV-enhanced room temperature NO<sub>2</sub> sensor using ZnO nanorods modified with SnO<sub>2</sub> nanoparticles. *Sensors and Actuators B: Chemical* **2012**, 162, 82–88.
- [3] Katoch, A.; Kim J.-H.; Kwon Y.J.; Kim H.W.; Kim S.S. Bifunctional Sensing Mechanism of SnO<sub>2</sub>-ZnO Composite Nanofibers for Drastically Enhancing the Sensing Behavior in H<sub>2</sub> Gas. *ACS applied materials & interfaces* **2015**, 7, 11351–11358.
- [4] Hui, G.; Zhu M.; Yang X.; Liu J.; Pan G.; Wang Z. Highly sensitive ethanol gas sensor based on CeO<sub>2</sub>/ZnO binary heterojunction composite. *Materials Letters* **2020**, 278, 128453.
- [5] Wang, Z.; Zhi M.; Xu M.; Guo C.; Man Z.; Zhang Z.; Li Q.; Lv Y.; Zhao W.; Yan J.; Zhai C. Ultrasensitive NO<sub>2</sub> gas sensor based on Sb-doped SnO<sub>2</sub> covered ZnO nano-heterojunction. *Journal of Materials Science* **2021**, 56, 7348–7356.
- [6] Wang, L.; Li J.; Wang Y.; Yu K.; Tang X.; Zhang Y.; Wang S.; Wei C. Construction of 1D SnO<sub>2</sub>-coated ZnO nanowire heterojunction for their improved n-butylamine sensing performances. *Scientific reports* **2016**, 6, 35079.
- [7] Zou, C.W.; Wang J.; Xie W. Synthesis and enhanced NO<sub>2</sub> gas sensing properties of ZnO nanorods/TiO<sub>2</sub> nanoparticles heterojunction composites. *Journal of Colloid and Interface Science* **2016**, 478, 22–28.
- [8] Lupan, O.; Postica V.; Gröttrup J.; Mishra A.K.; De Leeuw N.H.; Adelung R. Enhanced UV and ethanol vapour sensing of a single 3-D ZnO tetrapod alloyed with Fe<sub>2</sub>O<sub>3</sub> nanoparticles. *Sensors and Actuators B: Chemical* **2017**, 245, 448–461.
- [9] Wen, Z.; Tian-Mo L. Gas-sensing properties of SnO<sub>2</sub>-TiO<sub>2</sub>-based sensor for volatile organic compound gas and its sensing mechanism. *Physica B: Condensed Matter* **2010**, 405, 1345–1348.
- [10] Motaung, D.E.; Mhlomo G.H.; Makgwane P.R.; Dhonge B.P.; Cummings F.R.; Swart H.C.; Ray S.S. Ultra-high sensitive and selective H<sub>2</sub> gas sensor manifested by interface of n-n heterostructure of CeO<sub>2</sub>-SnO<sub>2</sub> nanoparticles. *Sensors and Actuators B: Chemical* **2018**, 254, 984–995.
- [11] Gu, D.; Li X.; Zhao Y.; Wang J. Enhanced NO<sub>2</sub> sensing of SnO<sub>2</sub>/SnS<sub>2</sub> heterojunction based sensor. *Sensors and Actuators B: Chemical* **2017**, 244, 67–76.
- [12] Qin, S.; Tang P.; Feng Y.; Li D. Novel ultrathin mesoporous ZnO-SnO<sub>2</sub> n-n heterojunction nanosheets with high sensitivity to ethanol. *Sensors and Actuators B: Chemical* **2020**, 309, 127801.
- [13] Xu, H.; Ju J.; Li W.; Zhang J.; Wang J.; Cao B. Superior triethylamine-sensing properties based on TiO<sub>2</sub>/SnO<sub>2</sub> n-n heterojunction nanosheets directly grown on ceramic tubes. *Sensors and Actuators B: Chemical* **2016**, 228, 634–642.
- [14] Xu, H.; Ju D.; Chen Z.; Han R.; Zhai T.; Yu H.; Liu C.; Wu X.; Wang J.; Cao B. A novel hetero-structure sensor based on Au/Mg-doped TiO<sub>2</sub>/SnO<sub>2</sub> nanosheets directly grown on Al<sub>2</sub>O<sub>3</sub> ceramic tubes. *Sensors and Actuators B: Chemical* **2018**, 273, 328–335.
- [15] Mondal, B.; Basumatari B.; Das J.; Roychaudhury C.; Saha H.; Mukherjee N. ZnO-SnO<sub>2</sub> based composite type gas sensor for selective hydrogen sensing. *Sensors and Actuators B: Chemical* **2014**, 194, 389–396.



- [16] Li, W.; Xu H.; Zhai T.; Yu H.; Chen Z.; Qiu Z.; Song X.; Wang J.; Cao B. Enhanced triethylamine sensing properties by designing Au@SnO<sub>2</sub>/MoS<sub>2</sub> nanostructure directly on alumina tubes. *Sensors and Actuators B: Chemical* **2017**, 253, 97–107.
- [17] Choi, K.S.; Park S.; Chang S.-P. Enhanced ethanol sensing properties based on SnO<sub>2</sub> nanowires coated with Fe<sub>2</sub>O<sub>3</sub> nanoparticles. *Sensors and Actuators B: Chemical* **2017**, 238, 871–879.
- [18] Van Duy, N.; Van Hieu N.; Huy P.T.; Chien N.D.; Thamilselvan M.; Yi J. Mixed SnO<sub>2</sub>/TiO<sub>2</sub> included with carbon nanotubes for gas-sensing application. *Physica E: Low-dimensional Systems and Nanostructures* **2008**, 41, 258–263.
- [19] Chen, Y.-J.; Xiao G.; Wang T.-S.; Zhang F.; Ma Y.; Gao P.; Zhu C.-L.; Zhang E.; Xu Z.; Li Q.-H.  $\alpha$ -MoO<sub>3</sub>/TiO<sub>2</sub> core/shell nanorods: Controlled-synthesis and low-temperature gas sensing properties. *Sensors and Actuators B: Chemical* **2011**, 155, 270–277.
- [20] Liang, Y.Q.; Cui Z.D.; Zhu S.L.; Li Z.Y.; Yang X.J.; Chen Y.J.; Ma J.M. Design of a highly sensitive ethanol sensor using a nano-coaxial p-Co<sub>3</sub>O<sub>4</sub>/n-TiO<sub>2</sub> heterojunction synthesized at low temperature. *Nanoscale* **2013**, 5, 10916–10926.
- [21] Deng, J.; Yu B.; Lou Z.; Wang L.; Wang R.; Zhang T. Facile synthesis and enhanced ethanol sensing properties of the brush-like ZnO–TiO<sub>2</sub> heterojunctions nanofibers. *Sensors and Actuators B: Chemical* **2013**, 184, 21–26.
- [22] Wang, Y.; Zhou Y.; Meng C.; Gao Z.; Cao X.; Li X.; Xu L.; Zhu W.; Peng X.; Zhang B.; Lin Y.; Liu L. A high-response ethanol gas sensor based on one-dimensional TiO<sub>2</sub>/V<sub>2</sub>O<sub>5</sub> branched nanoheterostructures. *Nanotechnology* **2016**, 27, 425503.
- [23] Zhao, P.X.; Tang Y.; Mao J.; Chen Y.X.; Song H.; Wang J.W.; Song Y.; Liang Y.Q.; Zhang X.M. One-Dimensional MoS<sub>2</sub>-Decorated TiO<sub>2</sub> nanotube gas sensors for efficient alcohol sensing. *Journal of Alloys and Compounds* **2016**, 674, 252–258.
- [24] Xun, H.; Zhang Z.; Yu A.; Yi J. Remarkably enhanced hydrogen sensing of highly-ordered SnO<sub>2</sub>-decorated TiO<sub>2</sub> nanotubes. *Sensors and Actuators B: Chemical* **2018**, 273, 983–990.
- [25] Yu, A.; Xun H.; Yi J. Improving Hydrogen Sensing Performance of TiO<sub>2</sub> Nanotube Arrays by ZnO Modification. *Frontiers in Materials* **2019**, 6,
- [26] Chen, K.; Chen S.; Pi M.; Zhang D. SnO<sub>2</sub> nanoparticles/TiO<sub>2</sub> nanofibers heterostructures: In situ fabrication and enhanced gas sensing performance. *Solid State Electron* **2019**, 157, 42–47.
- [27] Nguyen, D.D.; Do D.T.; Vu X.H.; Dang D.V.; Nguyen D.C. ZnO nanoplates surfaced-decorated by WO<sub>3</sub> nanorods for NH<sub>3</sub> gas sensing application. *Advances in Natural Sciences: Nanoscience and Nanotechnology* **2016**, 7, 015004.
- [28] Sharma, A.; Tomar M.; Gupta V. WO<sub>3</sub> nanoclusters–SnO<sub>2</sub> film gas sensor heterostructure with enhanced response for NO<sub>2</sub>. *Sensors and Actuators B: Chemical* **2013**, 176, 675–684.
- [29] Kida, T.; Nishiyama A.; Hua Z.; Suematsu K.; Yuasa M.; Shimanoe K. WO<sub>3</sub> nanolamella gas sensor: porosity control using SnO<sub>2</sub> nanoparticles for enhanced NO<sub>2</sub> sensing. *Langmuir : the ACS journal of surfaces and colloids* **2014**, 30, 2571–2579.
- [30] Lee, W.I.; Bonyani M.; Lee J.K.; Lee C.; Choi S.-B. Volatile organic compound sensing properties of MoO<sub>3</sub>–ZnO core–shell nanorods. *Current Applied Physics* **2018**, 18, S60–S67.
- [31] Kumar, R.; Goel N.; Mishra M.; Gupta G.; Fanetti M.; Valant M.; Kumar M. Growth of MoS<sub>2</sub>–MoO<sub>3</sub> Hybrid Microflowers via Controlled Vapor Transport Process for Efficient Gas Sensing at Room Temperature. *Advanced Materials Interfaces* **2018**, 5, 1800071.
- [32] Li, J.; Liu H.; Fu H.; Xu L.; Jin H.; Zhang X.; Wang L.; Yu K. Synthesis of 1D  $\alpha$ -MoO<sub>3</sub>/0D ZnO heterostructure nanobelts with enhanced gas sensing properties. *Journal of Alloys and Compounds* **2019**, 788, 248–256.
- [33] Yu, H.-L.; Li L.; Gao X.-M.; Zhang Y.; Meng F.; Wang T.-S.; Xiao G.; Chen Y.-J.; Zhu C.-L. Synthesis and H<sub>2</sub>S gas sensing properties of cage-like  $\alpha$ -MoO<sub>3</sub>/ZnO composite. *Sensors and Actuators B: Chemical* **2012**, 171–172, 679–685.
- [34] Jiang, D.; Wei W.; Li F.; Li Y.; Liu C.; Sun D.; Feng C.; Ruan S. Xylene gas sensor based on  $\alpha$ -MoO<sub>3</sub>/ $\alpha$ -Fe<sub>2</sub>O<sub>3</sub> heterostructure with high response and low operating temperature. *RSC Advances* **2015**, 5, 39442–39448.
- [35] Mane, A.A.; Nikam S.A.; Moholkar A.V. NO<sub>2</sub> gas sensing properties of sprayed composite porous MoO<sub>3</sub>-V<sub>2</sub>O<sub>5</sub> thin films. *Mater Chem Phys* **2018**, 216, 294–304.
- [36] Gao, X.; Ouyang Q.; Zhu C.; Zhang X.; Chen Y. Porous MoO<sub>3</sub>/SnO<sub>2</sub> Nanoflakes with n–n Junctions for Sensing H<sub>2</sub>S. *ACS Applied Nano Materials* **2019**, 2, 2418–2425.
- [37] Xue, D.; Zong F.; Zhang J.; Lin X.; Li Q. Synthesis of Fe<sub>2</sub>O<sub>3</sub>/WO<sub>3</sub> nanocomposites with enhanced sensing performance to acetone. *Chem Phys Lett* **2019**, 716, 61–68.
- [38] Zhao, C.; Zhang G.; Han W.; Fu J.; He Y.; Zhang Z.; Xie E. Electrospun In<sub>2</sub>O<sub>3</sub>/ $\alpha$ -Fe<sub>2</sub>O<sub>3</sub> heterostructure nanotubes for highly sensitive gas sensor applications. *CrystEngComm* **2013**, 15, 6491.
- [39] Kheel, H.; Sun G.-J.; Lee J.K.; Lee S.; Dwivedi R.P.; Lee C. Enhanced H<sub>2</sub>S sensing performance of TiO<sub>2</sub>-decorated  $\alpha$ -Fe<sub>2</sub>O<sub>3</sub> nanorod sensors. *Ceram Int* **2016**, 42, 18597–18604.
- [40] Si, S.; Li C.; Wang X.; Peng Q.; Li Y. Fe<sub>2</sub>O<sub>3</sub>/ZnO core–shell nanorods for gas sensors. *Sensors and Actuators B: Chemical* **2006**, 119, 52–56.
- [41] Fan, K.; Guo J.; Cha L.; Chen Q.; Ma J. Atomic layer deposition of ZnO onto Fe<sub>2</sub>O<sub>3</sub> nanoplates for enhanced H<sub>2</sub>S sensing. *Journal of Alloys and Compounds* **2017**, 698, 336–340.
- [42] Kaneti, Y.V.; Moriceau J.; Liu M.; Yuan Y.; Zakaria Q.; Jiang X.; Yu A. Hydrothermal synthesis of ternary  $\alpha$ -Fe<sub>2</sub>O<sub>3</sub>–ZnO–Au nanocomposites with high gas-sensing performance. *Sensors and Actuators B: Chemical* **2015**, 209, 889–897.
- [43] Wang, L.; Gao J.; Wu B.; Kan K.; Xu S.; Xie Y.; Li L.; Shi K. Designed Synthesis of In<sub>2</sub>O<sub>3</sub> Beads@TiO<sub>2</sub>-In<sub>2</sub>O<sub>3</sub> Composite Nanofibers for High Performance NO<sub>2</sub> Sensor at Room Temperature. *ACS applied materials & interfaces* **2015**, 7, 27152–27159.
- [44] Chi, X.; Liu C.; Liu L.; Li S.; Li H.; Zhang X.; Bo X.; Shan H. Enhanced formaldehyde-sensing properties of mixed Fe<sub>2</sub>O<sub>3</sub>–In<sub>2</sub>O<sub>3</sub> nanotubes. *Mat Sci Semicon Proc* **2014**, 18, 160–164.
- [45] Kim, S.; Park S.; Sun G.-J.; Hyun S.K.; Kim K.-K.; Lee C. Enhanced acetone gas sensing performance of the multiple-networked Fe<sub>2</sub>O<sub>3</sub>-functionalized In<sub>2</sub>O<sub>3</sub> nanowire sensor. *Current Applied Physics* **2015**, 15, 947–952.
- [46] Li, Y.; Deng D.; Xing X.; Chen N.; Liu X.; Xiao X.; Wang Y. A high performance methanol gas sensor based on palladium-platinum-In<sub>2</sub>O<sub>3</sub> composited nanocrystalline SnO<sub>2</sub>. *Sensors and Actuators B: Chemical* **2016**, 237, 133–141.

- [47] Ma, L.; Fan H.; Tian H.; Fang J.; Qian X. The n-ZnO/n-In<sub>2</sub>O<sub>3</sub> heterojunction formed by a surface-modification and their potential barrier-control in methanal gas sensing. *Sensors and Actuators B: Chemical* **2016**, 222, 508–516.
- [48] Park, S.; Kim H.; Jin C.; Lee C. Enhanced gas sensing properties of multiple networked In<sub>2</sub>O<sub>3</sub>-core/ZnO-shell nanorod sensors. *Journal of nanoscience and nanotechnology* **2013**, 13, 3427–3432.
- [49] Zang, W.; Nie Y.; Zhu D.; Deng P.; Xing L.; Xue X. Core-Shell In<sub>2</sub>O<sub>3</sub>/ZnO Nanoarray Nanogenerator as a Self-Powered Active Gas Sensor with High H<sub>2</sub>S Sensitivity and Selectivity at Room Temperature. *The Journal of Physical Chemistry C* **2014**, 118, 9209–9216.
- [50] Liu, J.; Dai M.; Wang T.; Sun P.; Liang X.; Lu G.; Shimanoe K.; Yamazoe N. Enhanced Gas Sensing Properties of SnO<sub>2</sub> Hollow Spheres Decorated with CeO<sub>2</sub> Nanoparticles Heterostructure Composite Materials. *ACS applied materials & interfaces* **2016**, 8, 6669–6677.
- [51] Lou, Z.; Li F.; Deng J.; Wang L.; Zhang T. Branch-like hierarchical heterostructure (alpha-Fe<sub>2</sub>O<sub>3</sub>/TiO<sub>2</sub>): a novel sensing material for trimethylamine gas sensor. *ACS applied materials & interfaces* **2013**, 5, 12310–12316.
- [52] Da Silva, L.F.; M'peko J.C.; Catto A.C.; Bernardini S.; Mastelaro V.R.; Aguir K.; Ribeiro C.; Longo E. UV-enhanced ozone gas sensing response of ZnO-SnO<sub>2</sub> heterojunctions at room temperature. *Sensors and Actuators B: Chemical* **2017**, 240, 573–579.
- [53] Wei, N.; Cui H.; Wang X.; Xie X.; Wang M.; Zhang L.; Tian J. Hierarchical assembly of In<sub>2</sub>O<sub>3</sub> nanoparticles on ZnO hollow nanotubes using carbon fibers as templates: Enhanced photocatalytic and gas-sensing properties. *J Colloid Interface Sci* **2017**, 498, 263–270.
- [54] Liu, Y.; Li G.; Mi R.; Deng C.; Gao P. An environment-benign method for the synthesis of p-NiO/n-ZnO heterostructure with excellent performance for gas sensing and photocatalysis. *Sensors and Actuators B: Chemical* **2014**, 191, 537–544.
- [55] Li, C.; Feng C.; Qu F.; Liu J.; Zhu L.; Lin Y.; Wang Y.; Li F.; Zhou J.; Ruan S. Electrospun nanofibers of p-type NiO/n-type ZnO heterojunction with different NiO content and its influence on trimethylamine sensing properties. *Sensors and Actuators B: Chemical* **2015**, 207, 90–96.
- [56] Hwang, H.; Kim H.; Kim D. Fabrication and Characterization of CuO Nanoparticles/ZnO Nanorods Heterojunction Structure for Room Temperature NO Gas Sensor Application. *Journal of Nanoscience and Nanotechnology* **2016**, 16, 11608–11612.
- [57] Wang, T.; Kou X.; Zhao L.; Sun P.; Liu C.; Wang Y.; Shimanoe K.; Yamazoe N.; Lu G. Flower-like ZnO hollow microspheres loaded with CdO nanoparticles as high performance sensing material for gas sensors. *Sensors and Actuators B: Chemical* **2017**, 250, 692–702.
- [58] Cai, L.; Li H.; Zhang H.; Fan W.; Wang J.; Wang Y.; Wang X.; Tang Y.; Song Y. Enhanced performance of the tangerines-like CuO-based gas sensor using ZnO nanowire arrays. *Materials Science in Semiconductor Processing* **2020**, 118, 105196.
- [59] Wang, X.; Li S.; Xie L.; Li X.; Lin D.; Zhu Z. Low-temperature and highly sensitivity H<sub>2</sub>S gas sensor based on ZnO/CuO composite derived from bimetal metal-organic frameworks. *Ceramics International* **2020**, 46, 15858–15866.
- [60] Lou, Z.; Deng J.; Wang L.; Wang L.; Fei T.; Zhang T. Toluene and ethanol sensing performances of pristine and PdO-decorated flower-like ZnO structures. *Sensors and Actuators B: Chemical* **2013**, 176, 323–329.
- [61] Park, S.; Sun G.J.; Jin C.; Kim H.W.; Lee S.; Lee C. Synergistic Effects of a Combination of Cr<sub>2</sub>O<sub>3</sub>-Functionalization and UV-Irradiation Techniques on the Ethanol Gas Sensing Performance of ZnO Nanorod Gas Sensors. *ACS applied materials & interfaces* **2016**, 8, 2805–2811.
- [62] Giebelhaus, I.; Varechkina E.; Fischer T.; Rumyantseva M.; Ivanov V.; Gaskov A.; Morante J.R.; Arbiol J.; Tyrre W.; Mathur S. One-dimensional CuO-SnO<sub>2</sub> p-n heterojunctions for enhanced detection of H<sub>2</sub>S. *Journal of Materials Chemistry A* **2013**, 1, 11261.
- [63] Wang, H.; Chen M.; Rong Q.; Zhang Y.; Hu J.; Zhang D.; Zhou S.; Zhao X.; Zhang J.; Zhu Z.; Liu Q. Ultrasensitive xylene gas sensor based on flower-like SnO<sub>2</sub>/Co<sub>3</sub>O<sub>4</sub> nanorods composites prepared by facile two-step synthesis method. *Nanotechnology* **2020**, 31, 255501.
- [64] Wang, Z.; Li Z.; Sun J.; Zhang H.; Wang W.; Zheng W.; Wang C. Improved Hydrogen Monitoring Properties Based on p-NiO/n-SnO<sub>2</sub> Heterojunction Composite Nanofibers. *The Journal of Physical Chemistry C* **2010**, 114, 6100–6105.
- [65] Ju, D.; Xu H.; Xu Q.; Gong H.; Qiu Z.; Guo J.; Zhang J.; Cao B. High triethylamine-sensing properties of NiO/SnO<sub>2</sub> hollow sphere P-N heterojunction sensors. *Sensors and Actuators B: Chemical* **2015**, 215, 39–44.
- [66] Xue, X.; Xing L.; Chen Y.; Shi S.; Wang Y.; Wang T. Synthesis and H<sub>2</sub>S Sensing Properties of CuO-SnO<sub>2</sub> Core/Shell PN-Junction Nanorods. *The Journal of Physical Chemistry C* **2008**, 112, 12157–12160.
- [67] Meng, D.; Liu D.; Wang G.; Shen Y.; San X.; Li M.; Meng F. Low-temperature formaldehyde gas sensors based on NiO-SnO<sub>2</sub> heterojunction microflowers assembled by thin porous nanosheets. *Sensors and Actuators B: Chemical* **2018**, 273, 418–428.
- [68] Bang, J.H.; Choi M.S.; Mirzaei A.; Kwon Y.J.; Kim S.S.; Kim T.W.; Kim H.W. Selective NO<sub>2</sub> sensor based on Bi<sub>2</sub>O<sub>3</sub> branched SnO<sub>2</sub> nanowires. *Sensors and Actuators B: Chemical* **2018**, 274, 356–369.
- [69] Meng, D.; Si J.; Wang M.; Wang G.; Shen Y.; San X.; Meng F. One-step synthesis and the enhanced trimethylamine sensing properties of Co<sub>3</sub>O<sub>4</sub>/SnO<sub>2</sub> flower-like structures. *Vacuum* **2020**, 171, 108994.
- [70] Chen, Y.-J.; Xiao G.; Wang T.-S.; Zhang F.; Ma Y.; Gao P.; Zhu C.-L.; Zhang E.; Xu Z.; Li Q.-H. Synthesis and enhanced gas sensing properties of crystalline CeO<sub>2</sub>/TiO<sub>2</sub> core/shell nanorods. *Sensors and Actuators B: Chemical* **2011**, 156, 867–874.
- [71] Alev, O.; Kilic A.; Cakirlar C.; Buyukkose S.; Ozturk Z.Z. Gas Sensing Properties of p-Co<sub>3</sub>O<sub>4</sub>/n-TiO<sub>2</sub> Nanotube Heterostructures. *Sensors* **2018**, 18,
- [72] Yin, L.; Qu G.; Guo P.; Zhang R.; Sun J.; Chen D. Construction and enhanced low-temperature H<sub>2</sub>S-sensing performance of novel hierarchical CuO@WO<sub>3</sub> nanocomposites. *Journal of Alloys and Compounds* **2019**, 785, 367–373.
- [73] Long, H.; Zeng W.; Li T. Hierarchically solvothermal synthesis of WO<sub>3</sub>-based nanocomposite: Nature-inspired structure and enhanced gas-sensing property. *Physica E: Low-dimensional Systems and Nanostructures* **2017**, 88, 206–211.
- [74] Ramgir, N.S.; Goyal C.P.; Sharma P.K.; Goutam U.K.; Bhattacharya S.; Datta N.; Kaur M.; Debnath A.K.; Aswal D.K.; Gupta S.K. Selective H<sub>2</sub>S sensing characteristics of CuO modified WO<sub>3</sub> thin films. *Sensors and Actuators B: Chemical* **2013**, 188, 525–532.
- [75] Park, S.; Park S.; Jung J.; Hong T.; Lee S.; Kim H.W.; Lee C. H<sub>2</sub>S gas sensing properties of CuO-functionalized WO<sub>3</sub> nanowires. *Ceramics International* **2014**, 40, 11051–11056.
- [76] Choi, S.; Bonyani M.; Sun G.-J.; Lee J.K.; Hyun S.K.; Lee C. Cr<sub>2</sub>O<sub>3</sub> nanoparticle-functionalized WO<sub>3</sub> nanorods for ethanol gas sensors. *Applied Surface Science* **2018**, 432, 241–249.

- [77] He, M.; Xie L.; Zhao X.; Hu X.; Li S.; Zhu Z.-G. Highly sensitive and selective H<sub>2</sub>S gas sensors based on flower-like WO<sub>3</sub>/CuO composites operating at low/room temperature. *Journal of Alloys and Compounds* **2019**, 788, 36–43.
- [78] Wang, T.-S.; Wang Q.-S.; Zhu C.-L.; Ouyang Q.-Y.; Qi L.-H.; Li C.-Y.; Xiao G.; Gao P.; Chen Y.-J. Synthesis and enhanced H<sub>2</sub>S gas sensing properties of  $\alpha$ -MoO<sub>3</sub>/CuO p-n junction nanocomposite. *Sensors and Actuators B: Chemical* **2012**, 171–172, 256–262.
- [79] Annanouch, F.E.; Roso S.; Haddi Z.; Vallejos S.; Umek P.; Bittencourt C.; Blackman C.; Vilic T.; Llobet E. p-Type PdO nanoparticles supported on n-type WO<sub>3</sub> nanoneedles for hydrogen sensing. *Thin Solid Films* **2016**, 618, 238–245.
- [80] Mirzaei, A.; Park S.; Sun G.-J.; Kheel H.; Lee C.; Lee S. Fe<sub>2</sub>O<sub>3</sub>/Co<sub>3</sub>O<sub>4</sub> composite nanoparticle ethanol sensor. *J Korean Phys Soc* **2016**, 69, 373–380.
- [81] Huang, X.-Y.; Chi Z.-T.; Liu J.; Li D.-H.; Sun X.-J.; Yan C.; Wang Y.-C.; Li H.; Wang X.-D.; Xie W.-F. Enhanced gas sensing performance based on p-NiS/n-In<sub>2</sub>O<sub>3</sub> heterojunction nanocomposites. *Sensors and Actuators B: Chemical* **2020**, 304, 127305.
- [82] Park, S.; Kim S.; Sun G.-J.; Lee C. Synthesis, Structure, and Ethanol Gas Sensing Properties of In<sub>2</sub>O<sub>3</sub> Nanorods Decorated with Bi<sub>2</sub>O<sub>3</sub> Nanoparticles. *ACS applied materials & interfaces* **2015**, 7, 8138–8146.
- [83] Yan, C.; Lu H.; Gao J.; Zhu G.; Yin F.; Yang Z.; Liu Q.; Li G. Synthesis of porous NiO-In<sub>2</sub>O<sub>3</sub> composite nanofibers by electrospinning and their highly enhanced gas sensing properties. *Journal of Alloys and Compounds* **2017**, 699, 567–574.
- [84] Kim, J.-H.; Lee J.-H.; Mirzaei A.; Kim H.W.; Kim S.S. Optimization and gas sensing mechanism of n-SnO<sub>2</sub>-p-Co<sub>3</sub>O<sub>4</sub> composite nanofibers. *Sensors and Actuators B: Chemical* **2017**, 248, 500–511.
- [85] Park, S.; Kim S.; Kheel H.; Lee C. Oxidizing gas sensing properties of the n-ZnO/p-Co<sub>3</sub>O<sub>4</sub> composite nanoparticle network sensor. *Sensors and Actuators B: Chemical* **2016**, 222, 1193–1200.
- [86] Huang, J.; Dai Y.; Gu C.; Sun Y.; Liu J. Preparation of porous flower-like CuO/ZnO nanostructures and analysis of their gas-sensing property. *Journal of Alloys and Compounds* **2013**, 575, 115–122.
- [87] Kim, J.; Kim W.; Yong K. CuO/ZnO Heterostructured Nanorods: Photochemical Synthesis and the Mechanism of H<sub>2</sub>S Gas Sensing. *The Journal of Physical Chemistry C* **2012**, 116, 15682–15691.
- [88] Patil, L.A.; Patil D.R. Heterocontact type CuO-modified SnO<sub>2</sub> sensor for the detection of a ppm level H<sub>2</sub>S gas at room temperature. *Sensors and Actuators B: Chemical* **2006**, 120, 316–323.
- [89] Shao, F.; Hoffmann M.W.G.; Prades J.D.; Zamani R.; Arbiol J.; Morante J.R.; Varechkina E.; Rumyantseva M.; Gaskov A.; Giebelhaus I.; Fischer T.; Mathur S.; Hernández-Ramírez F. Heterostructured p-CuO (nanoparticle)/n-SnO<sub>2</sub> (nanowire) devices for selective H<sub>2</sub>S detection. *Sensors and Actuators B: Chemical* **2013**, 181, 130–135.
- [90] Wang, L.; Kang Y.; Wang Y.; Zhu B.; Zhang S.; Huang W.; Wang S. CuO nanoparticle decorated ZnO nanorod sensor for low-temperature H<sub>2</sub>S detection. *Materials Science and Engineering: C* **2012**, 32, 2079–2085.
- [91] Yu, M.-R.; Suyambrakasam G.; Wu R.-J.; Chavali M. Performance evaluation of ZnO–CuO hetero junction solid state room temperature ethanol sensor. *Mater Res Bull* **2012**, 47, 1713–1718.
- [92] Zhang, Y.-B.; Yin J.; Li L.; Zhang L.-X.; Bie L.-J. Enhanced ethanol gas-sensing properties of flower-like p-CuO/n-ZnO heterojunction nanorods. *Sensors and Actuators B: Chemical* **2014**, 202, 500–507.
- [93] Liu, T.; Yu Z.; Liu Y.; Gao J.; Wang X.; Suo H.; Yang X.; Zhao C.; Liu F. Gas sensor based on Ni foam: SnO<sub>2</sub>-decorated NiO for Toluene detection. *Sensors and Actuators B: Chemical* **2020**, 318, 128167.
- [94] Dey, S.; Nag S.; Santra S.; Ray S.K.; Guha P.K. Voltage-controlled NiO/ZnO p-n heterojunction diode: a new approach towards selective VOC sensing. *Microsystems & Nanoengineering* **2020**, 6, 35.
- [95] Wang, Z.; Zhang K.; Fei T.; Gu F.; Han D.  $\alpha$ -Fe<sub>2</sub>O<sub>3</sub>/NiO heterojunction nanorods with enhanced gas sensing performance for acetone. *Sensors and Actuators B: Chemical* **2020**, 318, 128191.
- [96] Wang, C.; Cheng X.; Zhou X.; Sun P.; Hu X.; Shimanoe K.; Lu G.; Yamazoe N. Hierarchical  $\alpha$ -Fe<sub>2</sub>O<sub>3</sub>/NiO composites with a hollow structure for a gas sensor. *ACS applied materials & interfaces* **2014**, 6, 12031–12037.
- [97] Park, S.; Kim S.; Sun G.-J.; Choi S.; Lee S.; Lee C. Ethanol sensing properties of networked In<sub>2</sub>O<sub>3</sub> nanorods decorated with Cr<sub>2</sub>O<sub>3</sub>-nanoparticles. *Ceram Int* **2015**, 41, 9823–9827.
- [98] Park, S.; Sun G.-J.; Kheel H.; Lee W.I.; Lee S.; Choi S.-B.; Lee C. Synergistic effects of codecoration of oxide nanoparticles on the gas sensing performance of In<sub>2</sub>O<sub>3</sub> nanorods. *Sensors and Actuators B: Chemical* **2016**, 227, 591–599.
- [99] Bekermann, D.; Gasparotto A.; Barreca D.; Maccato C.; Comini E.; Sada C.; Sberveglieri G.; Devi A.; Fischer R.A. Co<sub>3</sub>O<sub>4</sub>/ZnO nanocomposites: from plasma synthesis to gas sensing applications. *ACS applied materials & interfaces* **2012**, 4, 928–934.
- [100] Cao, J.; Wang Z.; Wang R.; Liu S.; Fei T.; Wang L.; Zhang T. Core-shell Co<sub>3</sub>O<sub>4</sub>/ $\alpha$ -Fe<sub>2</sub>O<sub>3</sub> heterostructure nanofibers with enhanced gas sensing properties. *RSC Advances* **2015**, 5, 36340–36346.
- [101] Jeong, H.M.; Kim J.H.; Jeong S.Y.; Kwak C.H.; Lee J.H. Co<sub>3</sub>O<sub>4</sub>-SnO<sub>2</sub> Hollow Heteronanostructures: Facile Control of Gas Selectivity by Compositional Tuning of Sensing Materials via Galvanic Replacement. *ACS applied materials & interfaces* **2016**, 8, 7877–7883.
- [102] Qu, F.; Liu J.; Wang Y.; Wen S.; Chen Y.; Li X.; Ruan S. Hierarchical Fe<sub>3</sub>O<sub>4</sub>@Co<sub>3</sub>O<sub>4</sub> core-shell microspheres: Preparation and acetone sensing properties. *Sensors and Actuators B: Chemical* **2014**, 199, 346–353.
- [103] Staerz, A.; Kim T.-H.; Lee J.-H.; Weimar U.; Barsan N. Nanolevel Control of Gas Sensing Characteristics via p-n Heterojunction between Rh<sub>2</sub>O<sub>3</sub> Clusters and WO<sub>3</sub> Crystallites. *The Journal of Physical Chemistry C* **2017**, 121, 24701–24706.
- [104] Wang, L.; Lou Z.; Zhang R.; Zhou T.; Deng J.; Zhang T. Hybrid Co<sub>3</sub>O<sub>4</sub>/SnO<sub>2</sub> Core-Shell Nanospheres as Real-Time Rapid-Response Sensors for Ammonia Gas. *ACS applied materials & interfaces* **2016**, 8, 6539–6545.
- [105] Xiong, Y.; Xu W.; Zhu Z.; Xue Q.; Lu W.; Ding D.; Zhu L. ZIF-derived porous ZnO-Co<sub>3</sub>O<sub>4</sub> hollow polyhedrons heterostructure with highly enhanced ethanol detection performance. *Sensors and Actuators B: Chemical* **2017**, 253, 523–532.
- [106] Zhang, L.; Jing X.; Liu J.; Wang J.; Sun Y. Facile synthesis of mesoporous ZnO/Co<sub>3</sub>O<sub>4</sub> microspheres with enhanced gas-sensing for ethanol. *Sensors and Actuators B: Chemical* **2015**, 221, 1492–1498.
- [107] B., Z.; M. L.; Z. S.; H. K.; H. Y.; Q. L.; G. Z.; H. L. *Sens. Actuators, B* **2017**, 249, 558.

- [108] Chowdhuri, A.; Gupta V.; Sreenivas K. Fast response H<sub>2</sub>S gas sensing characteristics with ultra-thin CuO islands on sputtered SnO<sub>2</sub>. *Sensors and Actuators B: Chemical* **2003**, *93*, 572–579.
- [109] Mridha, S.; Basak D. Investigation of a p-CuO/n-ZnO thin film heterojunction for H<sub>2</sub>gas-sensor applications. *Semiconductor Science and Technology* **2006**, *21*, 928–932.
- [110] Yin, M.; Wang F.; Fan H.; Xu L.; Liu S. Heterojunction CuO@ZnO microcubes for superior p-type gas sensor application. *Journal of Alloys and Compounds* **2016**, *672*, 374–379.
- [111] Xue, X.-T.; Zhu L.-Y.; Yuan K.-P.; Zeng C.; Li X.-X.; Ma H.-P.; Lu H.-L.; Zhang D.W. ZnO branched p-Cu<sub>x</sub>O @n-ZnO heterojunction nanowires for improving acetone gas sensing performance. *Sensors and Actuators B: Chemical* **2020**, *324*, 128729.
- [112] Li, X.; Li X.; Chen N.; Li X.; Zhang J.; Yu J.; Wang J.; Tang Z. CuO-In<sub>2</sub>O<sub>3</sub>Core-Shell Nanowire Based Chemical Gas Sensors. *Journal of Nanomaterials* **2014**, *2014*, 1–7.
- [113] Park, S.; Kheel H.; Sun G.-J.; Ko T.; Lee W.I.; Lee C. Acetone Gas Sensing Properties of a Multiple-Networked Fe<sub>2</sub>O<sub>3</sub>-Functionalized CuO Nanorod Sensor. *Journal of Nanomaterials* **2015**, *2015*, 1–6.
- [114] Park, S.; Kim S.; Sun G.-J.; In Lee W.; Kim K.K.; Lee C. Fabrication and NO<sub>2</sub> gas sensing performance of TeO<sub>2</sub>-core/CuO-shell heterostructure nanorod sensors. *Nanoscale Res Lett* **2014**, *9*, 638.
- [115] Wang, Y.; Qu F.; Liu J.; Wang Y.; Zhou J.; Ruan S. Enhanced H<sub>2</sub>S sensing characteristics of CuO-NiO core-shell microspheres sensors. *Sensors and Actuators B: Chemical* **2015**, *209*, 515–523.
- [116] Meng, F.-N.; Di X.-P.; Dong H.-W.; Zhang Y.; Zhu C.-L.; Li C.; Chen Y.-J. Ppb H<sub>2</sub>S gas sensing characteristics of Cu<sub>2</sub>O/CuO sub-microspheres at low-temperature. *Sensors and Actuators B: Chemical* **2013**, *182*, 197–204.
- [117] Su, C.; Zhang L.; Han Y.; Ren C.; Zeng M.; Zhou Z.; Su Y.; Hu N.; Wei H.; Yang Z. Controllable synthesis of heterostructured CuO–NiO nanotubes and their synergistic effect for glycol gas sensing. *Sensors and Actuators B: Chemical* **2020**, *304*, 127347.
- [118] Xu, Y.; Fan Y.; Tian X.; Liang Q.; Liu X.; Sun Y. p-p heterojunction composite of NiFe<sub>2</sub>O<sub>4</sub> nanoparticles-decorated NiO nanosheets for acetone gas detection. *Materials Letters* **2020**, *270*, 127728.
- [119] Gao, H.; Guo J.; Li Y.; Xie C.; Li X.; Liu L.; Chen Y.; Sun P.; Liu F.; Yan X.; Liu F.; Lu G. Highly selective and sensitive xylene gas sensor fabricated from NiO/NiCr<sub>2</sub>O<sub>4</sub> p-p nanoparticles. *Sensors and Actuators B: Chemical* **2019**, *284*, 305–315.
- [120] Xu, H.; Zhang J.; Rehman A.U.; Gong L.; Kan K.; Li L.; Shi K. Synthesis of NiO@CuO nanocomposite as high-performance gas sensing material for NO<sub>2</sub> at room temperature. *Applied Surface Science* **2017**, *412*, 230–237.
- [121] Adamu, B.I.; Falak A.; Tian Y.; Tan X.; Meng X.; Chen P.; Wang H.; Chu W. p–p Heterojunction Sensors of p-Cu<sub>3</sub>Mo<sub>2</sub>O<sub>9</sub> Micro/Nanorods Vertically Grown on p-CuO Layers for Room-Temperature Ultrasensitive and Fast Recoverable Detection of NO<sub>2</sub>. *ACS Applied Materials & Interfaces* **2020**, *12*, 8411–8421.
